# Supplementary material for: Postnatal Development of Right Ventricular Myofibrillar Biomechanics in Relation to the Sarcomeric Protein Phenotype in Pediatric Patients with Conotruncal Heart Defects
Source: PubMed Central journal article supplement — J Am Heart Assoc. 2016 Jun 27;5(6):e003699. doi: 10.1161/JAHA.116.003699 (PMC4937289; doi:10.1161/jaha.116.003699), 2016-06-27
Supplement: JAH3-5-e003699-s001.pdf [file JAH3-5-e003699-s001.pdf]

## **Supplemental Material**

Supplemental Figures

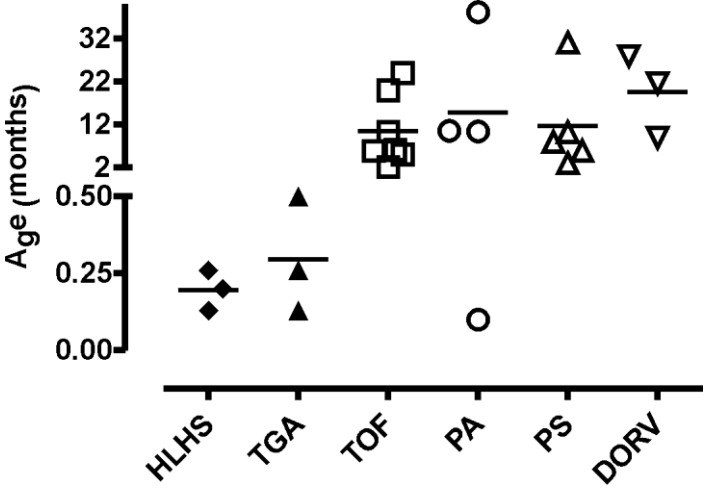

**Figure S1.** Relation between the age of the patients at the surgery and their clinical diagnosis. Patients with HLHS and TGA were operated at a significantly lower age whereas in the other patients the time of surgery did not depend on the diagnosis. Lines represent means. TOF, tetralogy of Fallot; PS, pulmonary stenosis; HLHS, hypoplastic left heart syndrome; DORV, double-outlet right ventricle; PA, pulmonary atresia; TGA, transposition of the great arteries. Exept for HLHS and TGA no significant differences were observed, indicating that the diagnosis does not affect timing of surgery.

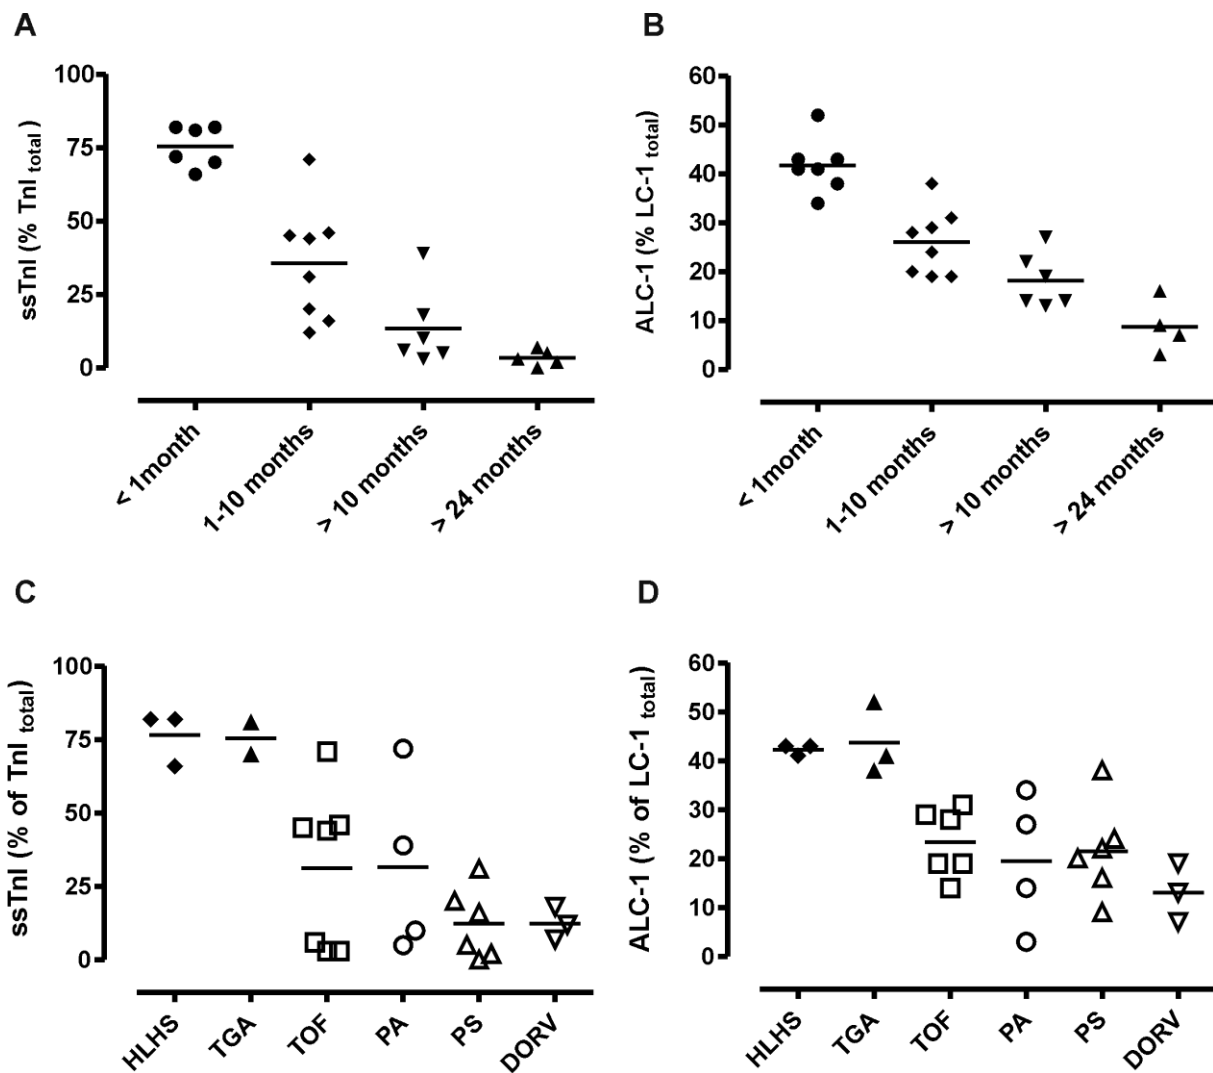

**Figure S2.** Dependence of ssTnI and ALC-1 expression versus age (A and B) and versus clinical diagnosis (C and D). Replot of expression levels of ALC-1 (A) as in Auckland et al. (1986) *Cardiovasc Res.* 20:828-36 as well as ssTnI (B) for different age groups. The decline in ALC-1 expression in our cohort is consistent with the published results. Patients with HLHS and TGA expressed significantly higher levels of the fetal ssTnI (C) and ALC-1 (D) isoforms than the other patients. There were no significant differences in these parameters between the other patients indicating that in these patients the diagnosis does not affect protein expression levels. The high variability in expression levels relates to the large age range at which repair surgery was performed; lines represent means. TOF, tetralogy of Fallot; PS, pulmonary stenosis; HLHS, hypoplastic left heart syndrome; DORV, double-outlet right ventricle; PA, pulmonary atresia; TGA, transposition of the great arteries.

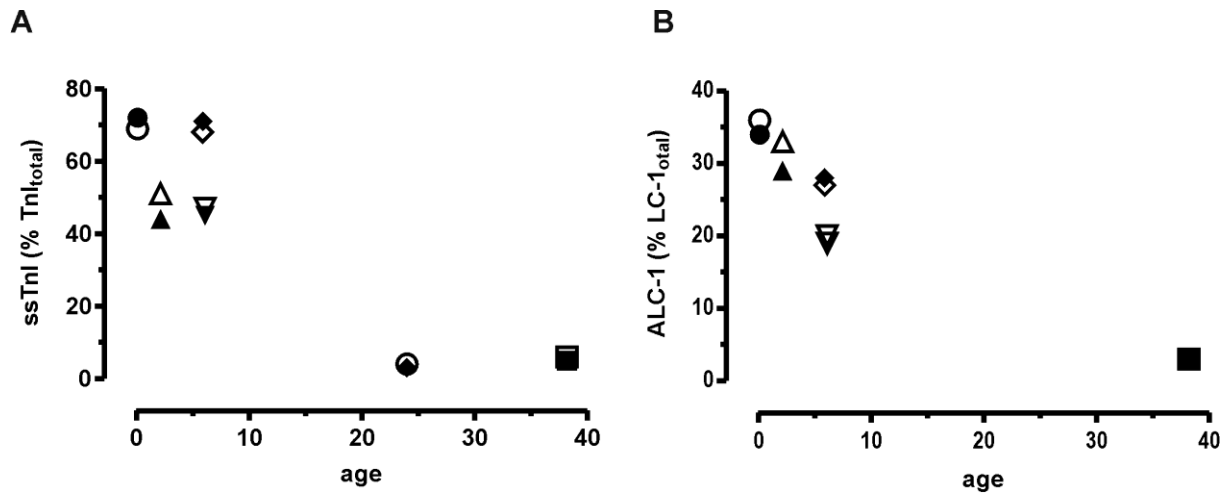

**Figure S3.** Expression levels of ssTnI (A) and ALC-1 (B) in tissues from the infundibulum and the moderator band from the RV taken from the same hearts. Open symbols, infundibulum; closed symbols, moderator band; circles, PA; squares, TOF. Each symbol represents one measurement.

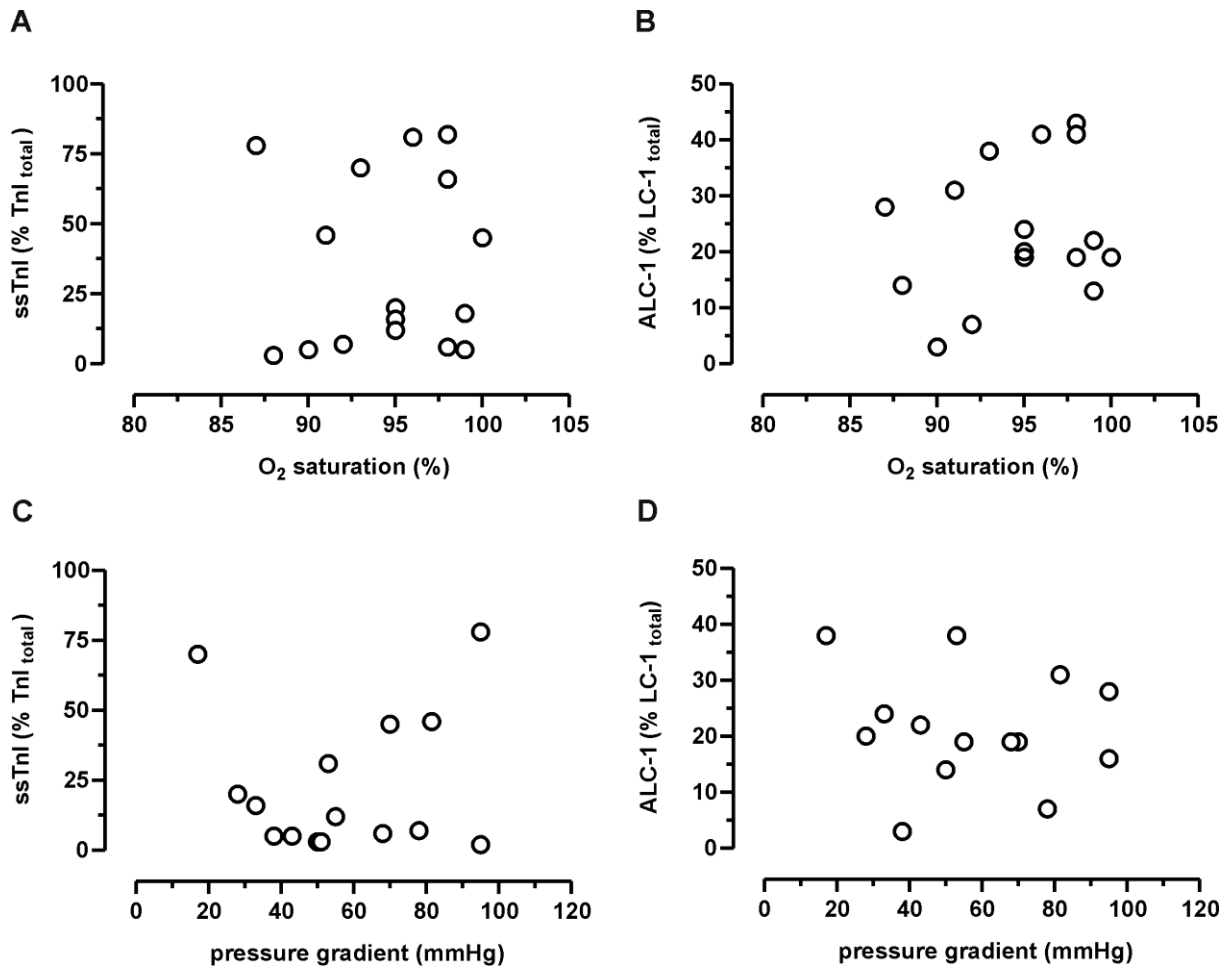

**Figure S4.** The expression levels of ALC-1 and ssTnI neither correlate with the oxygen saturation (A, B) nor the pressure gradient along the right ventricular outflow tract (C, D). The pressure gradient and the O<sub>2</sub> saturation were assessed before repair surgery.

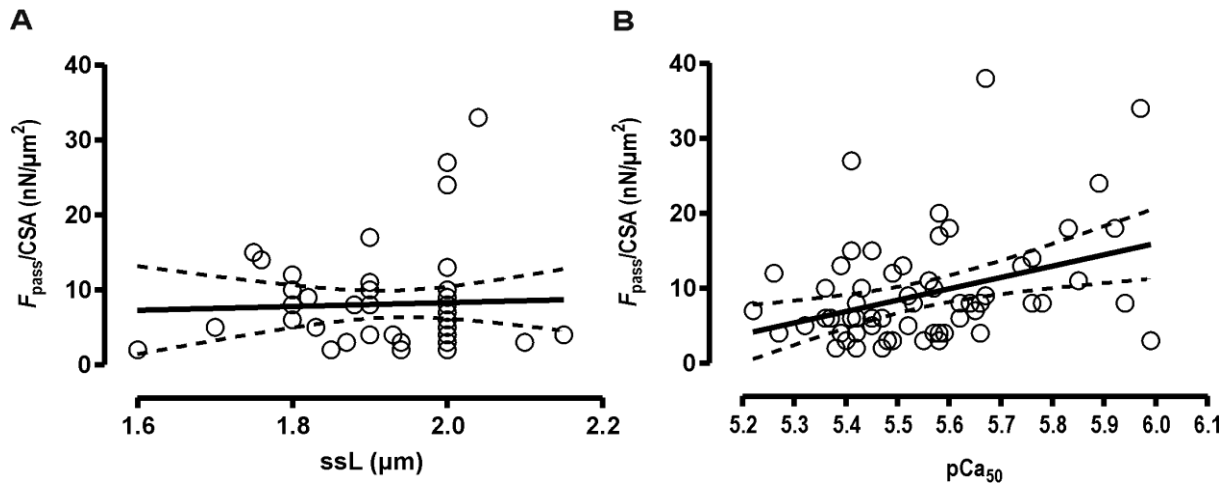

**Figure S5.** Interdependence of passive tension, slack sarcomere length (A), and  $\text{Ca}^{2+}$ -sensitivity (B) for individual myofibrillar bundles. While there was no effect of slack sarcomere length on passive tension ( $P=0.766$ ), passive tension positively correlated with  $\text{Ca}^{2+}$ -sensitivity of force generation ( $r^2=0.13$ ,  $P=0.003$ ). Solid and dotted lines represent linear correlations and 95% confidence limits. Each data point represents determination from one myofibrillar bundle.

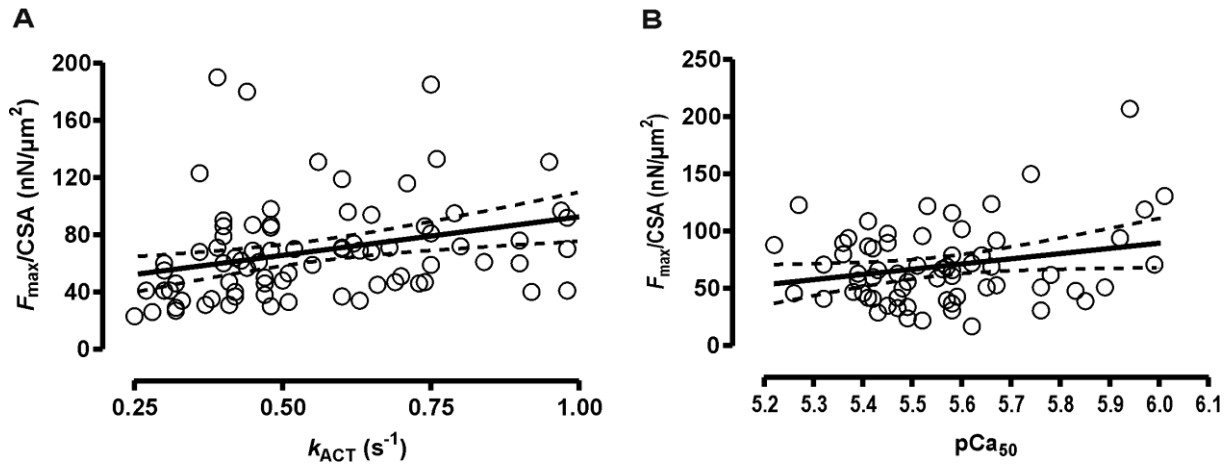

**Figure S6.** Relation between maximal force per cross-sectional area ( $F_{\max}/\text{CSA}$ ) and  $k_{\text{ACT}}$  (A), or  $\text{pCa}_{50}$  (B), respectively. The maximal tension correlated significantly with the  $\text{Ca}^{2+}$ -induced contraction kinetics ( $r^2=0.11$ ,  $P=0.0025$ ) and with the  $\text{Ca}^{2+}$ -sensitivity of force ( $r^2=0.06$ ,  $P=0.044$ ). The rate constant  $k_{\text{ACT}}$  reflects the sum of apparent rate constants by which the cross-bridges enter and leave the force-generating state; i.e.,  $k_{\text{ACT}} = f_{\text{app}} + g_{\text{app}}$ . Furthermore,  $F_{\max}$  is proportional to  $f_{\text{app}}/(f_{\text{app}}+g_{\text{app}})$ . Because  $F_{\max}$  is positively and not negatively correlated with  $k_{\text{ACT}}$ , increased maximal force relates to an increase in  $f_{\text{app}}$  rather than to a decrease in  $g_{\text{app}}$ . Of note,  $k_{\text{ACT}}$  would also increase if  $g_{\text{app}}$  is increased. However, this would result in a decreased  $F_{\max}$ . Thus, increased isometric force generation and contraction kinetics at high ALC1-expression levels can be explained by an increased  $f_{\text{app}}$ , i.e. by the increased probability of cross-bridges to form force-generating interactions with actin. Solid and dotted lines represent linear correlations and 95% confidence limits. Each data point represents determination from one myofibrillar bundle.

## Supplemental Tables

**Table S1** Clinical characteristics of patients.

| <b>Patient</b> | <b>Age, months</b> | <b>Diagnosis</b>                                         | <b>Palliation</b>       | <b>Medication</b>                  | <b>SpO<sub>2</sub>, %</b> | <b>G, mmHg</b> |
|----------------|--------------------|----------------------------------------------------------|-------------------------|------------------------------------|---------------------------|----------------|
| <b>1</b>       | 2.16               | TOF with predominant valvar PS , microdeletion 22q11     | Pulmonary valvuloplasty | –                                  |                           |                |
| <b>2</b>       | 5.1                | TOF                                                      |                         | beta blocker                       | 91                        | 81.5           |
| <b>3</b>       | 5.9                | TOF, severely underdeveloped PA system                   |                         | beta blocker                       | 87                        | 95             |
| <b>4</b>       | 6.1                | TOF,                                                     |                         | beta blocker                       | 100                       | 70             |
| <b>5</b>       | 10.36              | TOF with complete AVSD, trisomy 21                       | AP shunt                | ACE, furosemide, ASS, beta blocker | 85–90                     | 50             |
| <b>6</b>       | 20                 | Residual RVOTO after TOF correction, microdeletion 22q11 |                         | –                                  | 98                        | 60–75          |
| <b>7</b>       | 24                 | TOF                                                      | BT shunt                | –                                  | 85–90                     | 51             |
| <b>8</b>       | 0.1                | PA/ IVS                                                  | Pulmonary valvuloplasty | –                                  |                           |                |
| <b>9</b>       | 10.46              | PA with VSD, TGA, severely hypoplastic (rPA & IPA)       | AP shunt, BD            | –                                  |                           |                |
| <b>10</b>      | 10.63              | PA with VSD                                              | AP shunt                | –                                  |                           |                |



|             |       |                                                                                           |                                                    |                            |        |        |
|-------------|-------|-------------------------------------------------------------------------------------------|----------------------------------------------------|----------------------------|--------|--------|
| <b>11</b>   | 38.2  | PA with VSD                                                                               |                                                    | –                          | 90     | 35–40  |
| <b>12</b>   | 3     | Severe supra-valvar PS, VSD                                                               | RV-PA conduit, VSD closure                         | spironolactone, HCT        |        | 53     |
| <b>13</b>   | 5.9   | RVOTO with VSD                                                                            |                                                    | spironolactone, furosemide | 95     | 25–30  |
| <b>14</b>   | 8     | AVSD, moderate RVOTO, large secundum ASD, trisomy 21                                      |                                                    | beta blocker               | 95     | 30–35  |
| <b>15</b>   | 10.23 | HCM with pronounced LVH, RVH, Infundibular and valvar PS secundum ASD                     | Primary ASD closure, Patch reconstruction of RVOTO | –                          | 99     | 40–45  |
| <b>16</b>   | 31    | Common arterial trunk post-correction; severe RV-PA conduit stenosis, microdeletion 22q11 | Patch reconstruction of RVOTO, conduit replacement | –                          |        | 90–100 |
| <b>17</b>   | 127   | PA with VSD, RV – PA conduit stenosis, severe PV insufficiency                            | RV-PA conduit replacement, VSD closure             | –                          |        | 45–55  |
| <b>18/1</b> | 9     | DORV with valvar PS                                                                       | Patch reconstruction of RVOTO, VSD closure         | beta blocker               | 93–97  | 50–60  |
| <b>18/2</b> | 28    | Subpulmonary stenosis after DORV correction                                               |                                                    | beta blocker               | 92     | 75–80  |
| <b>19</b>   | 21.6  | DORV, microdeletion of Chr 6                                                              | PAB                                                | furosemide                 | 98–99  |        |
| <b>20</b>   | 0.13  | HLHS                                                                                      |                                                    | PG                         | 95–100 |        |

|           |      |           |                |    |       |
|-----------|------|-----------|----------------|----|-------|
| <b>21</b> | 0.2  | HLHS      | PG             | 98 |       |
| <b>22</b> | 0.26 | HLHS      | PG, furosemide |    |       |
| <b>23</b> | 0.13 | DILV, TGA |                |    |       |
| <b>24</b> | 0.26 | DILV, TGA | PG, furosemide | 93 | 13–20 |
| <b>25</b> | 0.5  | DILV, TGA | –              | 96 |       |

Abbreviations in alphabetical order: AP, aortopulmonary; AVI, aortic valve insufficiency; BT, Blalock–Taussig; DILV, double inlet left ventricle; DORV, double-outlet right ventricle; G, pre-surgery pressure gradient across right ventricular outflow tract; HCM, hypertrophic cardiomyopathy; HCT, Hydrochlorothiazide; HLHS, hypoplastic left heart syndrome; IVS, intact ventricular septum; LVH, left ventricular hypertrophy; PA, pulmonary atresia; PAB, pulmonary artery banding; PG, prostaglandin; PS, pulmonary stenosis; PV, pulmonary valve; RVH, right ventricular hypertrophy; RVOTO, right ventricular outflow tract obstruction; TGA, transposition of the great arteries; TOF, tetralogy of Fallot; VSD, ventricular septal defect. 18/1 and 18/2 are samples from the same patient obtained 9 and 28 months after birth, respectively.

**Table S2** Expression levels of sarcomeric protein isoforms in RV samples.

| <b>Patient</b> | <b>Diagnosis</b> | <b>Age (M)</b> | <b>% ssTnI</b> | <b>% ALC-1</b> | <b>LC-1/LC-2</b> | <b>TnT4</b> | <b>N2AB:N2B</b> |
|----------------|------------------|----------------|----------------|----------------|------------------|-------------|-----------------|
| 1              | TOF              | 2.16           | 44             | 29             | 1.11             | nd          | nd              |
| 2              | TOF              | 5.1            | 46             | 31             | 1.14             | –           | nd              |
| 3              | TOF              | 5.9            | 71             | 28             | 1.10             | +           | 37:63           |
| 4              | TOF              | 6.1            | 45             | 19             | 1.11             | –           | nd              |
| 5              | TOF              | 10.36          | 3              | 14             | 1.03             | +           | 38:62           |
| 6              | TOF              | 20             | 6              | 19             | 1.04             | –           | nd              |
| 7              | TOF              | 24             | 3              | nd             | nd               | –           | nd              |
| 8              | PA               | 0.1            | 72             | 34             | 1.11             | +           | nd              |
| 9              | PA               | 10.46          | 10             | 27             | 1.06             | +           | 44:56           |
| 10             | PA               | 10.63          | 39             | 14             | 0.93             | nd          | nd              |
| 11             | PA               | 38.2           | 5              | 3              | 0.84             | –           | 31:69           |
| 12             | PS               | 3              | 31             | 38             | 0.84             | +           | nd              |
| 13             | PS               | 5.9            | 20             | 20             | 1.07             | nd          | nd              |
| 14             | PS               | 8              | 16             | 24             | 1.00             | –           | nd              |
| 15             | PS               | 10.23          | 5              | 22             | 0.99             | nd          | 42:58           |
| 16             | PS               | 31             | 2              | 16             | 1.39             | –           | 44:56           |
| 17             | PS               | 127            | 0              | 9              | 0.99             | –           | nd              |
| 18a            | DORV             | 9              | 12             | 19             | 0.84             | nd          | nd              |
| 18b            | DORV             | 28             | 7              | 7              | 0.94             | nd          | nd              |
| 19             | DORV             | 21.6           | 18             | 13             | 0.81             | –           | nd              |

|    |       |      |    |    |      |   |       |
|----|-------|------|----|----|------|---|-------|
| 20 | HPLHS | 0.13 | 82 | 43 | 0.93 | + | nd    |
| 21 | HPLHS | 0.2  | 66 | 41 | 1.03 | - | nd    |
| 22 | HPLHS | 0.26 | 82 | 43 | 0.99 | + | nd    |
| 23 | TGA   | 0.13 | nd | 52 | 0.93 | - | nd    |
| 24 | TGA   | 0.26 | 70 | 38 | 0.96 | - | 60:40 |
| 25 | TGA   | 0.5  | 81 | 41 | 1.09 | - | nd    |

TOF, tetralogy of Fallot; PS, pulmonary stenosis; HPLHS, hypoplastic left heart syndrome; DORV, double-outlet right ventricle; PA, pulmonary atresia; TGA, transposition of the great arteries. Age is given in months. (-) indicates that the fetal isoforms of TnT were not detectable, and nd indicates not done. Note that in patients 20 -25 no functional data could be determined.

**Table S3** Summary of functional characterization.

| Patient | Diagnosis | Age at surgery (months) | $pCa_{50}$      | $n_H$           | $F_{\max}/CSA$ (nN/ $\mu\text{m}^2$ ) | $F_{\text{pass}}/CSA$ (nN/ $\mu\text{m}^2$ ) | $k_{\text{ACT}}$ ( $\text{s}^{-1}$ ) | $k_{\text{TR}}$ ( $\text{s}^{-1}$ ) | $k_{\text{LIN}}$ ( $\text{s}^{-1}$ ) | $t_{\text{LIN}}$ ( $\text{s}^{-1}$ ) | $k_{\text{REL}}$ ( $\text{s}^{-1}$ ) |
|---------|-----------|-------------------------|-----------------|-----------------|---------------------------------------|----------------------------------------------|--------------------------------------|-------------------------------------|--------------------------------------|--------------------------------------|--------------------------------------|
| 1       | TOF       | 2.16                    | $5.71 \pm 0.05$ | $2.42 \pm 0.44$ | $69 \pm 4$                            | $9 \pm 5$                                    | nd                                   | $0.37 \pm 0.05$                     | $0.29 \pm 0.04$                      | $0.25 \pm 0.02$                      | $5.98 \pm 0.21$                      |
| 2       | TOF       | 5.1                     | $5.56 \pm 0.03$ | $2.23 \pm 0.17$ | $100 \pm 12$                          | $11 \pm 3$                                   | $0.70 \pm 0.07$                      | $0.55 \pm 0.03$                     | $0.47 \pm 0.07$                      | $0.19 \pm 0.01$                      | $3.85 \pm 0.22$                      |
| 3       | TOF       | 5.9                     | $5.84 \pm 0.05$ | $1.16 \pm 0.25$ | $62 \pm 16$                           | $11 \pm 2$                                   | $0.57 \pm 0.09$                      | $0.53 \pm 0.05$                     | $0.34 \pm 0.03$                      | $0.26 \pm 0.02$                      | $2.78 \pm 0.19$                      |
| 4       | TOF       | 6.1                     | $5.52 \pm 0.03$ | $2.42 \pm 0.19$ | $64 \pm 10$                           | $16 \pm 4$                                   | $0.43 \pm 0.03$                      | $0.57 \pm 0.07$                     | $0.18 \pm 0.04$                      | $0.33 \pm 0.05$                      | $1.67 \pm 0.19$                      |
| 5       | TOF       | 10.36                   | $5.40 \pm 0.05$ | $2.20 \pm 0.13$ | $75 \pm 13$                           | $5 \pm 1$                                    | $0.42 \pm 0.06$                      | $0.36 \pm 0.02$                     | $0.44 \pm 0.07$                      | $0.21 \pm 0.02$                      | $3.19 \pm 0.34$                      |
| 6       | TOF       | 20                      | $5.41 \pm 0.01$ | $2.20 \pm 0.20$ | $62 \pm 12$                           | $5 \pm 1$                                    | $0.41 \pm 0.03$                      | $0.26 \pm 0.03$                     | $0.46 \pm 0.11$                      | $0.17 \pm 0.02$                      | $2.97 \pm 0.23$                      |
| 7       | TOF       | 24                      | $5.55 \pm 0.07$ | $1.65 \pm 0.20$ | $61 \pm 3$                            | $5 \pm 1$                                    | $0.35 \pm 0.02$                      | $0.27 \pm 0.03$                     | $0.21 \pm 0.09$                      | $0.26 \pm 0.06$                      | $2.17 \pm 0.30$                      |
| 8       | PA        | 0.1                     | $5.95 \pm 0.03$ | $1.50 \pm 0.34$ | $128 \pm 27$                          | $16 \pm 7$                                   | $0.63 \pm 0.07$                      | $0.62 \pm 0.06$                     | $0.36 \pm 0.08$                      | $0.36 \pm 0.02$                      | $3.99 \pm 0.39$                      |
| 9       | PA        | 10.46                   | $5.54 \pm 0.03$ | $2.03 \pm 0.15$ | $83 \pm 11$                           | $5 \pm 1$                                    | $0.62 \pm 0.08$                      | $0.61 \pm 0.06$                     | $0.38 \pm 0.03$                      | $0.24 \pm 0.03$                      | $2.64 \pm 0.29$                      |
| 11      | PA        | 38.2                    | $5.33 \pm 0.05$ | $1.88 \pm 0.23$ | $91 \pm 6$                            | $6 \pm 1$                                    | $0.47 \pm 0.04$                      | $0.37 \pm 0.05$                     | $0.27 \pm 0.09$                      | $0.27 \pm 0.03$                      | $2.31 \pm 0.29$                      |
| 14      | PS        | 8                       | $5.41 \pm 0.04$ | $1.54 \pm 0.09$ | $86 \pm 10$                           | $14 \pm 2$                                   | $0.68 \pm 0.07$                      | $0.51 \pm 0.05$                     | $0.27 \pm 0.07$                      | $0.30 \pm 0.03$                      | $3.16 \pm 0.34$                      |

|    |      |       |                 |                 |             |            |                 |                 |                 |                 |                 |
|----|------|-------|-----------------|-----------------|-------------|------------|-----------------|-----------------|-----------------|-----------------|-----------------|
| 15 | PS   | 10.23 | $5.47 \pm 0.03$ | $1.90 \pm 0.13$ | $80 \pm 9$  | $7 \pm 1$  | $0.66 \pm 0.03$ | $0.54 \pm 0.06$ | $0.46 \pm 0.04$ | $0.13 \pm 0.01$ | $4.39 \pm 0.30$ |
| 17 | PS   | 127   | $5.54 \pm 0.03$ | $4.69 \pm 1.30$ | $37 \pm 6$  | $4 \pm 1$  | $0.30 \pm 0.04$ | $0.29 \pm 0.02$ | $0.25 \pm 0.02$ | $0.32 \pm 0.02$ | $1.77 \pm 0.06$ |
| 19 | DORV | 216   | $5.67 \pm 0.07$ | $1.15 \pm 0.20$ | $89 \pm 10$ | $15 \pm 3$ | $0.71 \pm 0.08$ | $0.56 \pm 0.09$ | $0.41 \pm 0.14$ | $0.17 \pm 0.02$ | $2.91 \pm 0.23$ |

---

pCa<sub>50</sub>,  $-\log[\text{Ca}^{2+}]$  required for half-maximal activation;  $n_H$ , steepness of force-Ca<sup>2+</sup> relation;  $F_{\text{max}}$ , active steady state force;  $F_{\text{pass}}$ , passive steady state force; CSA, cross-sectional area;  $k_{\text{ACT}}$  and  $k_{\text{TR}}$ , rate constant of Ca<sup>2+</sup>-induced and mechanically-induced contraction, respectively;  $k_{\text{LIN}}$  (lasting for  $t_{\text{LIN}}$ ) and  $k_{\text{REL}}$ , rate constant of initial, slow, linear and of the subsequent rapid exponential relaxation phase, respectively; TOF, tetralogy of Fallot; PS, pulmonary stenosis; HPLHS, hypoplastic left heart syndrome; DORV, double-outlet right ventricle; PA, pulmonary atresia; TGA, transposition of the great arteries; nd, not done. Values are means  $\pm$  SEM of 2–12 myofibrils for each patient.
